# Supplementary material
Source: publisher figshare collection journal article supplement (https://tandf.figshare.com/ndownloader/files/20739681)
Supplement: Supplementary file 1 [file 20739681]

## SUPPLEMENTARY MATERIALS

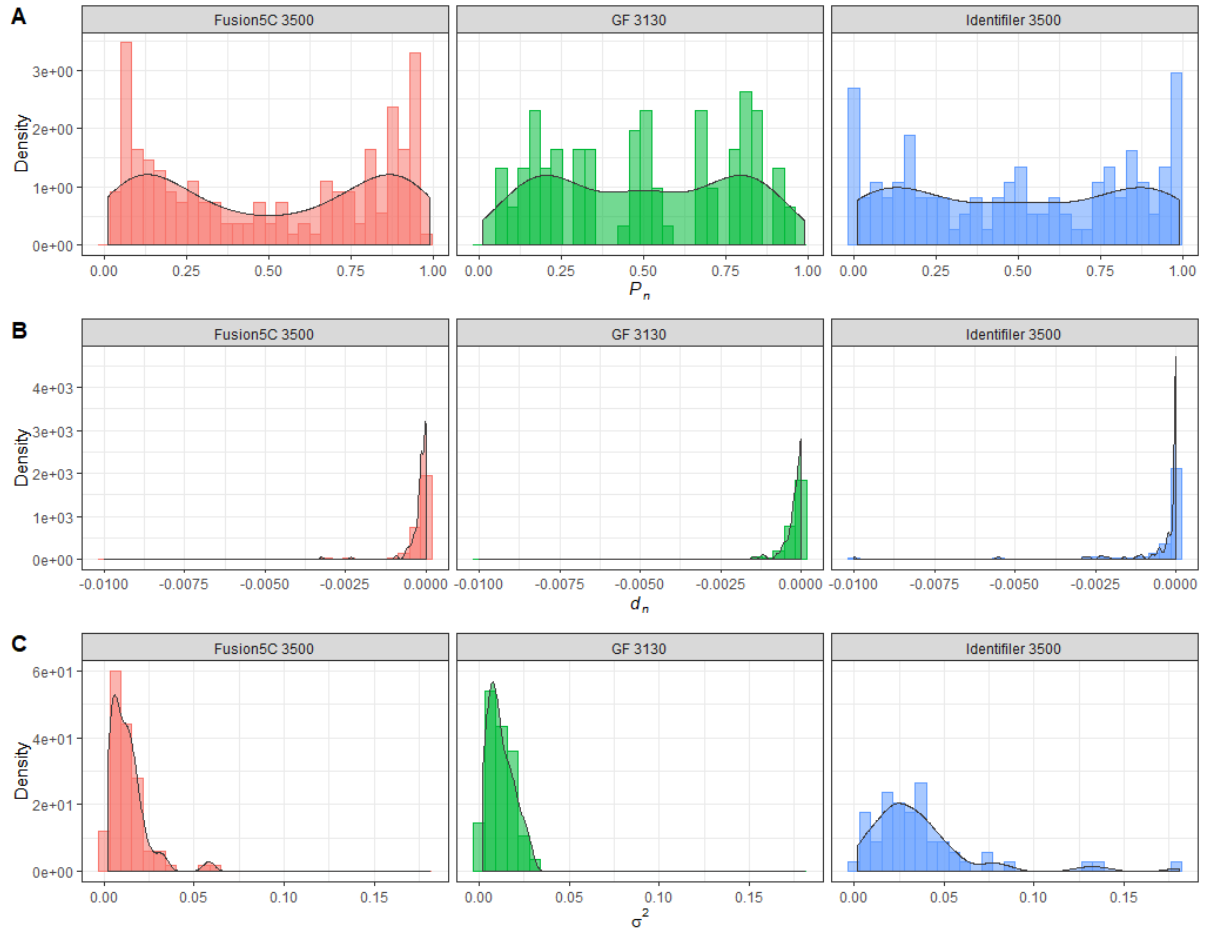

Figure S1: Density plots and density histogram of the optimised values,  $P_n$  (A),  $d_n$  (B), and  $\sigma^2$  (C), for each kit, PowerPlex® Fusion (Red), GlobalFiler™ (Green), and Identifiler™ (Blue).

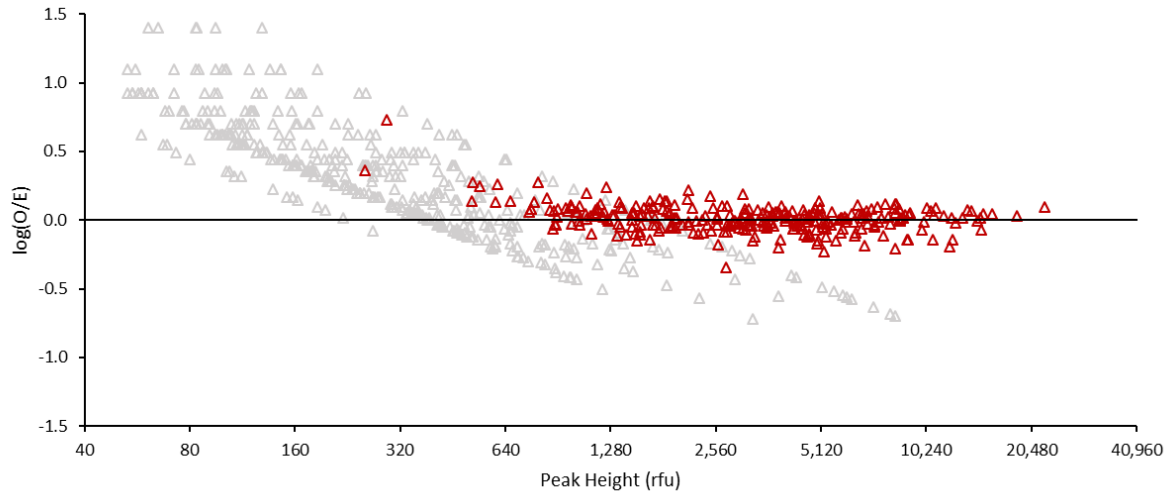

Figure S2: Plot of  $\log\left(\frac{O}{S}\right)$  versus allelic peak height for Identifiler™ profiles analysed using an ABI 3500 genetic analyser where missing stutter data were imputed by sampling from  $U[0,50]$ . Observed back stutter peaks are designated using a red triangle, and imputed back stutter peaks are designated using a grey triangle.

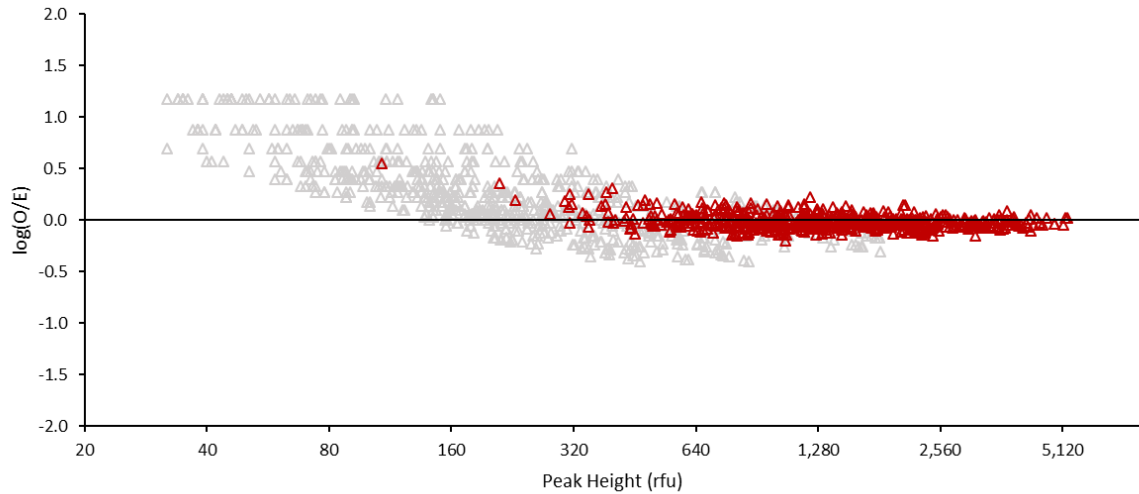

Figure S3: Plot of  $\log\left(\frac{O}{S}\right)$  versus allelic peak height for GlobalFiler™ profiles analysed using an ABI 3130 genetic analyser where missing stutter data were imputed by sampling from  $U[0,30]$ . Observed back stutter peaks are designated using a red triangle, and imputed back stutter peaks are designated using a grey triangle.

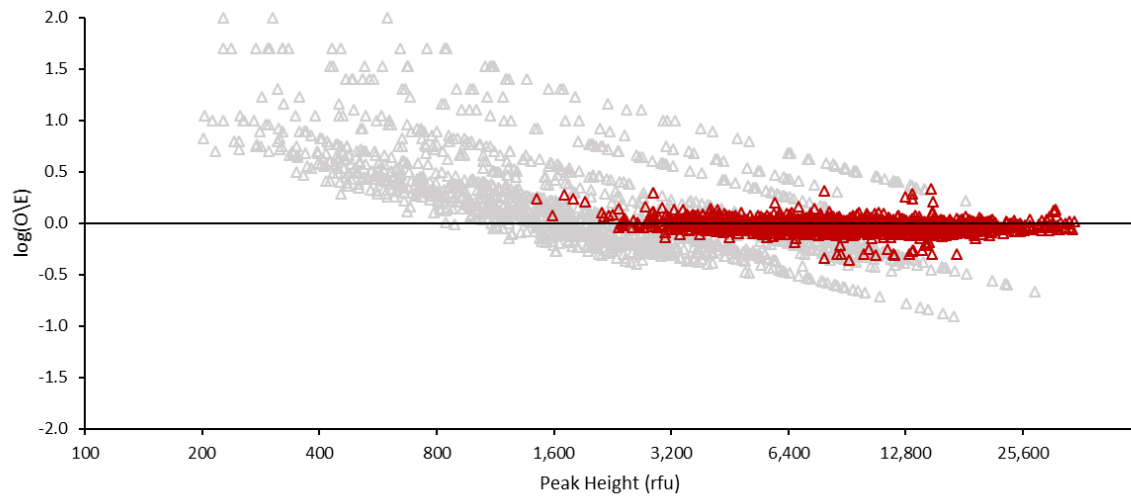

Figure S4: Plot of  $\log\left(\frac{O}{E}\right)$  versus allelic peak height for PowerPlex® Fusion profiles analysed using an ABI 3500 genetic analyser where missing stutter data were imputed by sampling from  $U[0,200]$ . Observed back stutter peaks are designated using a red triangle, and imputed back stutter peaks are designated using a grey triangle.
